# Supplementary material for: Synthesis and characterization of macrodiols and non-segmented poly(ester-urethanes) (PEUs) derived from α,ω-hydroxy telechelic poly(ε-caprolactone) (HOPCLOH): effect of initiator, degree of polymerization, and diisocyanate
Source: Royal Society of Chemistry journal article supplement (doi:10.1039/d4ra03951c), 2024-01-01
Supplement: d4ra03951c1.pdf [file d4ra03951c1.pdf]

## Supplementary Information

---

### **Synthesis and characterization of macrodiols and non-segmented poly(ester-urethanes) derived from $\alpha,\omega$ -hydroxy telechelic poly( $\epsilon$ -caprolactone) (HOPCLOH). Effect of initiator, degree of polymerization, and diisocyanate**

Miriam P. Barrera-Nava<sup>1</sup>, Rodrigo Navarro<sup>2</sup>, Ángel Marcos-Fernández<sup>2</sup>, José E. Báez<sup>1\*</sup>

<sup>1</sup> Department of Chemistry, University of Guanajuato (UG), Noria Alta S/N, 36050 Guanajuato, Gto, Mexico.

<sup>2</sup> Institute of Polymer Science and Technology, CSIC, C/Juan de la Cierva No. 3, 28006 Madrid, Spain.

---

\*Correspondence to: José E. Báez. Email: [jebaez@ugto.mx](mailto:jebaez@ugto.mx)

## Table of contents

| Tables                                                                                                                                                                                                                                                                                                                                           | Page |
|--------------------------------------------------------------------------------------------------------------------------------------------------------------------------------------------------------------------------------------------------------------------------------------------------------------------------------------------------|------|
| <b>Table S1.</b> Poly( $\epsilon$ -caprolactone) diols (HOPCLOH) prepared using different types of linear aliphatic diols [HO(CH <sub>2</sub> ) <sub>m</sub> OH, where m=4, 8, and 12] as initiators in the ROP of CL. <sup>a</sup>                                                                                                              | 4    |
| <b>Table S2.</b> Poly(ester-urethanes) (PEUs) derived from poly( $\epsilon$ -caprolactone) diols (HOPCLOH) and three different types diisocyanates (HDI, MDI, and HMDI).                                                                                                                                                                         | 5    |
| <b>Table S3.</b> Number-average molecular weight obtained by two different techniques of the HOPCLOH prepared using different types of linear aliphatic diols [HO(CH <sub>2</sub> ) <sub>m</sub> OH, where m=4, 8, and 12] as initiators in the ROP of CL. <sup>a</sup>                                                                          | 6    |
| <b>Table S4.</b> Complete thermal properties of poly(ester-urethanes) (PEUs) derived from poly( $\epsilon$ -caprolactone) diols (HOPCLOH) and three different types diisocyanates (HDI, MDI, and HMDI). Effect of the number of methylenes in HOPCLOH on the PEU. <sup>a</sup>                                                                   | 7    |
| <b>Table S5.</b> Mechanical properties of poly(ester-urethanes) (PEUs) derived from poly( $\epsilon$ -caprolactone) diols (HOPCLOH) and three different diisocyanates (HDI, MDI, and HMDI). Effect of the number of methylenes in HOPCLOH on the PEU. <sup>a</sup>                                                                               | 9    |
| <b>Figures</b>                                                                                                                                                                                                                                                                                                                                   |      |
| <b>Fig. S1.</b> <sup>13</sup> C NMR (100 MHz) spectrum in CDCl <sub>3</sub> at room temperature for PEU <sub>4a10A</sub> .                                                                                                                                                                                                                       | 10   |
| <b>Fig. S2.</b> <sup>13</sup> C NMR (100 MHz) spectrum in CDCl <sub>3</sub> at room temperature for PEU <sub>4a10B</sub> .                                                                                                                                                                                                                       | 11   |
| <b>Fig. S3.</b> <sup>13</sup> C NMR (100 MHz) spectrum in CDCl <sub>3</sub> at room temperature for PEU <sub>4a10C</sub> .                                                                                                                                                                                                                       | 12   |
| <b>Fig. S4.</b> MALDI-TOF spectrum (linear mode) expanded view for the 1000–2000 m/z fragments of HOPCL <sub>4a10</sub> OH (note: 114 and 16 are the values of the molecular weight of CL and the difference between Na <sup>+</sup> and K <sup>+</sup> (doping the same species of polymer), respectively).                                     | 13   |
| <b>Fig. S5.</b> MALDI-TOF spectrum (linear mode) expanded view for the 1000–2000 m/z fragments of HOPCL <sub>8a10</sub> OH (note: 114 and 16 are the values of the molecular weight of CL and the difference between Na <sup>+</sup> and K <sup>+</sup> (doping the same species of polymer), respectively).                                     | 14   |
| <b>Fig. S6.</b> Effect of number of methylenes on the crystallinity PCL for poly(ester-urethanes) (PEUs) derived from poly( $\epsilon$ -caprolactone) diols (HOPCLOH) and 1,6-hexamethylene diisocyanate (HDI). The PEUs derived from the macrodiols with DP=5 as initiator are indicated with open squares □, and macrodiols are indicated with | 15   |

filled square ■ ; PEUs derived from macrodiols with DP=10 as initiator are indicated with open circles ○, and macrodiols are indicated with filled circles ●, and PEUs derived from macrodiols with DP=15 as initiator are indicated with open triangles △, and macrodiols are indicated with filled triangle▲.

**Fig. S7.** Effect of Hard Segment (HS) content on the crystallinity PCL for poly(ester-urethanes) (PEUs) derived from poly( $\epsilon$ -caprolactone) diols (HOPCLOH) and 1,6-hexamethylene diisocyanate (HDI). The PEUs derived from the macrodiols with HO(CH<sub>2</sub>)<sub>4</sub>OH as initiator are indicated with squares (◻ DP=5; ◻ DP=10, and ◼ DP=15); PEUs derived from macrodiols with HO(CH<sub>2</sub>)<sub>8</sub>OH as initiator are indicated with circles (⊕ DP=5, ○ DP=10, and ● DP=15) and PEUs derived from macrodiols with HO(CH<sub>2</sub>)<sub>12</sub>OH as initiator are indicated with triangles (△ DP=5, △ DP=10, and ▲ DP=15).

16

**Fig. S8.** Mechanical properties of the synthesized PEUs with HDI: a) stress at break, b) strain at break, and c) modulus. The PEUs derived from the macrodiols with HO(CH<sub>2</sub>)<sub>4</sub>OH as initiator are indicated with squares (◻ DP=5; ◻ DP=10, and ◼ DP=15); PEUs derived from macrodiols with HO(CH<sub>2</sub>)<sub>8</sub>OH used as initiator are indicated with circles (⊕ DP=5, ○ DP=10, and ● DP=15) and PEUs derived from macrodiols with HO(CH<sub>2</sub>)<sub>12</sub>OH as initiator are indicated with triangles (△ DP=5, △ DP=10, and ▲ DP=15).

17

**Table S1.** Poly( $\epsilon$ -caprolactone) diols (HOPCLOH) prepared using different types of linear aliphatic diols  $[\text{HO}(\text{CH}_2)_m\text{OH}]$ , where  $m=4, 8,$  and  $12]$  as initiators in the ROP of CL.<sup>a</sup>

| DP (calcd) | Initiator                |                          |                           |
|------------|--------------------------|--------------------------|---------------------------|
|            | 1,4-BD <sup>b</sup>      | 1,8-OD <sup>c</sup>      | 1,12-DD <sup>d</sup>      |
| 5          | HOPCL <sub>4a5</sub> OH  | HOPCL <sub>8a5</sub> OH  | HOPCL <sub>12a5</sub> OH  |
| 10         | HOPCL <sub>4a10</sub> OH | HOPCL <sub>8a10</sub> OH | HOPCL <sub>12a10</sub> OH |
| 15         | HOPCL <sub>4a15</sub> OH | HOPCL <sub>8a15</sub> OH | HOPCL <sub>12a15</sub> OH |

<sup>a</sup>Polymerization at 150°C for 90 min with 65 mmol of CL, three CL/initiator molar ratios of 5,10, and 15 were used in the experiments ( $\text{DP}_{(\text{calcd})}=5, 10,$  or  $15$ ) and ammonium decamolybdate as a catalyst. HOPCLOH= HO – PCL – OH or HO –  $(\text{CH}_2)_m$  – PCL – OH, where  $m = 4, 8,$  and  $12$ .

<sup>b</sup>1,4-Butanediol

<sup>c</sup>1,8-Octanediol

<sup>d</sup>1,12-Dodecanediol

**Table S2.** Poly(ester-urethanes) (PEUs) derived from poly( $\epsilon$ -caprolactone) diols (HOPCLOH) and three different types diisocyanates (HDI, MDI, and HMDI).

| Diisocyanate | <b>1,4-BD</b>            |                           |                           |
|--------------|--------------------------|---------------------------|---------------------------|
|              | HOPCL <sub>4a5</sub> OH  | HOPCL <sub>4a10</sub> OH  | HOPCL <sub>4a15</sub> OH  |
| HDI          | PEU <sub>4a5A</sub>      | PEU <sub>4a10A</sub>      | PEU <sub>4a15A</sub>      |
| MDI          | PEU <sub>4a5B</sub>      | PEU <sub>4a10B</sub>      | PEU <sub>4a15B</sub>      |
| HMDI         | PEU <sub>4a5C</sub>      | PEU <sub>4a10C</sub>      | PEU <sub>4a15C</sub>      |
| Diisocyanate | <b>1,8-OD</b>            |                           |                           |
|              | HOPCL <sub>8a5</sub> OH  | HOPCL <sub>8a10</sub> OH  | HOPCL <sub>8a15</sub> OH  |
| HDI          | PEU <sub>8a5A</sub>      | PEU <sub>8a10A</sub>      | PEU <sub>8a15A</sub>      |
| MDI          | PEU <sub>8a5B</sub>      | PEU <sub>8a10B</sub>      | PEU <sub>8a15B</sub>      |
| HMDI         | PEU <sub>8a5C</sub>      | PEU <sub>8a10C</sub>      | PEU <sub>8a15C</sub>      |
| Diisocyanate | <b>1,12-DD</b>           |                           |                           |
|              | HOPCL <sub>12a5</sub> OH | HOPCL <sub>12a10</sub> OH | HOPCL <sub>12a15</sub> OH |
| HDI          | PEU <sub>12a5A</sub>     | PEU <sub>12a10A</sub>     | PEU <sub>12a15A</sub>     |
| MDI          | PEU <sub>12a5B</sub>     | PEU <sub>12a10B</sub>     | PEU <sub>12a15B</sub>     |
| HMDI         | PEU <sub>12a5C</sub>     | PEU <sub>12a10C</sub>     | PEU <sub>12a15C</sub>     |

**Table S3.** Number-average molecular weight obtained by two different techniques of the HOPCLOH prepared using different types of linear aliphatic diols [HO(CH<sub>2</sub>)<sub>m</sub>OH, where m=4, 8, and 12] as initiators in the ROP of CL.<sup>a</sup>

| Sample                    | Initiator                             | Alkyl(%) <sup>b,c</sup> | Conv(%) <sup>b</sup> | DP(calcd) | <i>M<sub>n</sub></i> (calcd) <sup>d</sup> | <i>M<sub>n</sub></i> (NMR) <sup>d,e</sup> | <i>M<sub>n</sub></i> (SEC) <sup>f</sup> | <i>M<sub>w</sub></i> / <i>M<sub>n</sub></i> <sup>f</sup> | Ratio <sup>g</sup> |
|---------------------------|---------------------------------------|-------------------------|----------------------|-----------|-------------------------------------------|-------------------------------------------|-----------------------------------------|----------------------------------------------------------|--------------------|
| HOPCL <sub>4a5</sub> OH   | HO(CH <sub>2</sub> ) <sub>4</sub> OH  | 16                      | 98                   | 5         | 650                                       | 570                                       | 1868                                    | 1.23                                                     | 0.38               |
| HOPCL <sub>4a10</sub> OH  | HO(CH <sub>2</sub> ) <sub>4</sub> OH  | 8                       | 98                   | 10        | 1230                                      | 1120                                      | 2575                                    | 1.33                                                     | 0.48               |
| HOPCL <sub>4a15</sub> OH  | HO(CH <sub>2</sub> ) <sub>4</sub> OH  | 5                       | 99                   | 15        | 1760                                      | 1660                                      | 3300                                    | 1.37                                                     | 0.53               |
| HOPCL <sub>8a5</sub> OH   | HO(CH <sub>2</sub> ) <sub>8</sub> OH  | 23                      | 99                   | 5         | 710                                       | 640                                       | 1819                                    | 1.19                                                     | 0.39               |
| HOPCL <sub>8a10</sub> OH  | HO(CH <sub>2</sub> ) <sub>8</sub> OH  | 12                      | 99                   | 10        | 1300                                      | 1210                                      | 2585                                    | 1.33                                                     | 0.50               |
| HOPCL <sub>8a15</sub> OH  | HO(CH <sub>2</sub> ) <sub>8</sub> OH  | 9                       | 99                   | 15        | 1750                                      | 1630                                      | 3184                                    | 1.36                                                     | 0.55               |
| HOPCL <sub>12a5</sub> OH  | HO(CH <sub>2</sub> ) <sub>12</sub> OH | 29                      | 99                   | 5         | 770                                       | 690                                       | 1849                                    | 1.18                                                     | 0.41               |
| HOPCL <sub>12a10</sub> OH | HO(CH <sub>2</sub> ) <sub>12</sub> OH | 16                      | 99                   | 10        | 1350                                      | 1250                                      | 2651                                    | 1.32                                                     | 0.51               |
| HOPCL <sub>12a15</sub> OH | HO(CH <sub>2</sub> ) <sub>12</sub> OH | 11                      | 99                   | 15        | 1910                                      | 1780                                      | 3716                                    | 1.39                                                     | 0.51               |

<sup>a</sup>Polymerization at 150°C for 90 min with 65 mmol of CL, three CL/initiator molar ratios of 5,10, and 15 were used in the experiments (DP<sub>(calcd)</sub>=5, 10, or 15) and ammonium decamolybdate as a catalyst. HOPCLOH= HO – PCL – OH or HO – (CH<sub>2</sub>)<sub>m</sub> – PCL – OH, where m = 4, 8, and 12.

<sup>b</sup>Determined by <sup>1</sup>H NMR in CDCl<sub>3</sub>.

<sup>c</sup>Obtained from the equation alkyl (%) = (MW<sub>initiator</sub>/M<sub>n</sub>(NMR)) x 100, where MW<sub>initiator</sub> is the molecular weight of initiator or alkyl diol (HOROH).

<sup>d</sup>Obtained from the equation *M<sub>n</sub>*(calcd) = (MW(CL))(mmol CL/mmol ROH) + MW(HOROH), where MW is the molecular weight of ε-caprolactone monomer or aliphatic diol (HOROH).

<sup>e</sup>Obtained from the equation *M<sub>n</sub>*(NMR) = (DP<sub>(PCL)</sub> x MW(CL)) + MW(ROH), where MW is the molecular weight of ε-caprolactone monomer or aliphatic diol (HOROH).

<sup>f</sup>Determined by SEC results.

<sup>g</sup>*M<sub>n</sub>*(calcd)/*M<sub>n</sub>*(SEC) ratio.

**Table S4.** Complete thermal properties of poly(ester-urethanes) (PEUs) derived from poly( $\epsilon$ -caprolactone) diols (HOPCLOH) and three different types diisocyanates (HDI, MDI, and HMDI). Effect of the number of methylenes in HOPCLOH on the PEU.<sup>a</sup>

| Sample                 | Precursor                 | HS (%) <sup>b,d</sup> | SS (%) <sup>b,d</sup> | $T_g$ (°C) <sup>e</sup> | $T_c$ (°C) <sup>e</sup> | $T_m$ (°C) <sup>e</sup> | $\Delta H_m$ (J/g) <sup>e</sup> | $\Delta H_{mpCL}$ (J/g) <sup>f</sup> | $\chi_i$ (%) <sup>g</sup> | Alkyl (%) <sup>h</sup> |
|------------------------|---------------------------|-----------------------|-----------------------|-------------------------|-------------------------|-------------------------|---------------------------------|--------------------------------------|---------------------------|------------------------|
| PEU <sub>4a5</sub> A   | HOPCL <sub>4a5</sub> OH   | 24                    | 76                    | -49                     | -                       | 51                      | 10                              | 10                                   | 7                         | 16                     |
| PEU <sub>4a10</sub> A  | HOPCL <sub>4a10</sub> OH  | 14                    | 86                    | -57                     | -                       | 31                      | 15                              | 15                                   | 11                        | 8                      |
| PEU <sub>4a15</sub> A  | HOPCL <sub>4a15</sub> OH  | 10                    | 90                    | -57                     | -                       | 43                      | 29                              | 29                                   | 22                        | 5                      |
| PEU <sub>8a5</sub> A   | HOPCL <sub>8a5</sub> OH   | 23                    | 77                    | -49                     | -                       | 51                      | 13                              | 10                                   | 7                         | 23                     |
| PEU <sub>8a10</sub> A  | HOPCL <sub>8a10</sub> OH  | 13                    | 87                    | -58                     | -                       | 30                      | 19                              | 16                                   | 12.5                      | 12                     |
| PEU <sub>8a15</sub> A  | HOPCL <sub>8a15</sub> OH  | 10                    | 90                    | -61                     | -                       | 41                      | 31                              | 28                                   | 20                        | 9                      |
| PEU <sub>12a5</sub> A  | HOPCL <sub>12a5</sub> OH  | 22                    | 78                    | -47                     | -                       | 58                      | 15                              | 12                                   | 9                         | 29                     |
| PEU <sub>12a10</sub> A | HOPCL <sub>12a10</sub> OH | 13                    | 87                    | -58                     | -                       | 36                      | 19                              | 16                                   | 12                        | 16                     |
| PEU <sub>12a15</sub> A | HOPCL <sub>12a15</sub> OH | 10                    | 90                    | -58                     | -                       | 46                      | 29                              | 26                                   | 19                        | 11                     |
| PEU <sub>4a5</sub> B   | HOPCL <sub>4a5</sub> OH   | 33                    | 67                    | -17                     | -                       | -                       | -                               | -                                    | -                         | 16                     |
| PEU <sub>4a10</sub> B  | HOPCL <sub>4a10</sub> OH  | 20                    | 80                    | -40                     | -                       | -                       | -                               | -                                    | -                         | 8                      |
| PEU <sub>4a15</sub> B  | HOPCL <sub>4a15</sub> OH  | 14                    | 86                    | -48                     | -3                      | 35                      | 25                              | 25                                   | 18                        | 5                      |
| PEU <sub>8a5</sub> B   | HOPCL <sub>8a5</sub> OH   | 31                    | 69                    | -14                     | -                       | -                       | -                               | -                                    | -                         | 23                     |
| PEU <sub>8a10</sub> B  | HOPCL <sub>8a10</sub> OH  | 19                    | 81                    | -41                     | -                       | -                       | -                               | -                                    | -                         | 12                     |
| PEU <sub>8a15</sub> B  | HOPCL <sub>8a15</sub> OH  | 15                    | 85                    | -46                     | -1                      | 29                      | 13                              | 11                                   | 8                         | 9                      |
| PEU <sub>12a5</sub> B  | HOPCL <sub>12a5</sub> OH  | 29                    | 71                    | -18                     | -                       | -                       | -                               | -                                    | -                         | 29                     |
| PEU <sub>12a10</sub> B | HOPCL <sub>12a10</sub> OH | 18                    | 82                    | -41                     | -                       | 13                      | 1                               | 1                                    | 1                         | 16                     |
| PEU <sub>12a15</sub> B | HOPCL <sub>12a15</sub> OH | 14                    | 86                    | -49                     | -12                     | 33                      | 24                              | 21                                   | 16                        | 11                     |
| PEU <sub>4a5</sub> C   | HOPCL <sub>4a5</sub> OH   | 33                    | 67                    | -22                     | -                       | -                       | -                               | -                                    | -                         | 16                     |
| PEU <sub>4a10</sub> C  | HOPCL <sub>4a10</sub> OH  | 21                    | 79                    | -49                     | -                       | -                       | -                               | -                                    | -                         | 8                      |
| PEU <sub>4a15</sub> C  | HOPCL <sub>4a15</sub> OH  | 15                    | 85                    | -54                     | 3                       | 37                      | 20                              | 20                                   | 15                        | 5                      |
| PEU <sub>8a5</sub> C   | HOPCL <sub>8a5</sub> OH   | 30                    | 70                    | -28                     | -                       | 35                      | 1                               | 1                                    | 1                         | 23                     |
| PEU <sub>8a10</sub> C  | HOPCL <sub>8a10</sub> OH  | 19                    | 81                    | -50                     | -                       | -                       | -                               | -                                    | -                         | 12                     |
| PEU <sub>8a15</sub> C  | HOPCL <sub>8a15</sub> OH  | 15                    | 85                    | -54                     | 2                       | 31                      | 6                               | 5                                    | 4                         | 9                      |
| PEU <sub>12a5</sub> C  | HOPCL <sub>12a5</sub> OH  | 29                    | 71                    | -29                     | -                       | -                       | -                               | -                                    | -                         | 29                     |
| PEU <sub>12a10</sub> C | HOPCL <sub>12a10</sub> OH | 19                    | 81                    | -49                     | -                       | 21                      | 2                               | 2                                    | 1                         | 16                     |
| PEU <sub>12a15</sub> C | HOPCL <sub>12a15</sub> OH | 14                    | 86                    | -56                     | -31                     | 34                      | 27                              | 24                                   | 18                        | 11                     |

HOPCLOH,  $\alpha,\omega$ -hydroxy telechelic poly( $\epsilon$ -caprolactone); PCL, poly( $\epsilon$ -caprolactone); PEU, poly(ester-urethane); HS, hard segment; SS, soft segment; A, 1,6-hexamethylene diisocyanate (HDI); B, methylene diphenyl diisocyanate (MDI); C, 4,4'-methylenebis (cyclohexyl isocyanate) (HMDI)). DSC, differential scanning calorimetry.

<sup>a</sup>HOPCLOH = HO – PCL – OH or HO – (CH<sub>2</sub>)<sub>m</sub> – PCL – OH, where m = 4, 8, and 12.

<sup>b</sup>Hard segment.

<sup>c</sup>Soft segment.

<sup>d</sup>Weight percent.

<sup>e</sup>Obtained by DSC analysis.

<sup>f</sup>Calculated from the equation  $\Delta H_{mPCL} = \Delta H_m \cdot X_{SS}$  where  $X_{SS}$  is the weight fraction of soft segment in the HOCLOH oligoester.

<sup>g</sup>Quantified from  $\Delta H_m$ .

<sup>h</sup>Calculated with respect to the HOPCLOH precursor. Percent determined by <sup>1</sup>H NMR in CDCl<sub>3</sub>. Calculated from the equation  $\text{alkyl (\%)} = (MW_{\text{initiator}}/M_n(\text{NMR})) \times 100$ , where  $MW_{\text{initiator}}$  is the molecular weight of initiator or alkyl diol (HOROH).



**Table S5.** Mechanical properties of poly(ester-urethanes) (PEUs) derived from poly( $\epsilon$ -caprolactone) diols (HOPCLOH) and three different diisocyanates (HDI, MDI, and HMDI). Effect of the number of methylenes in HOPCLOH on the PEU.<sup>a</sup>

| Sample                 | Precursor                 | Stress at break (MPa) | Strain at break (%) | Modulus (MPa) | $\chi_i$ (%) <sup>b</sup> |
|------------------------|---------------------------|-----------------------|---------------------|---------------|---------------------------|
| PEU <sub>4a5</sub> A   | HOPCL <sub>4a5</sub> OH   | 23.7 ± 1.70           | 948 ± 98            | 54.5 ± 3.0    | 7.0                       |
| PEU <sub>4a10</sub> A  | HOPCL <sub>4a10</sub> OH  | 19.1 ± 1.39           | 1197 ± 13           | 2.9 ± 1.1     | 11.0                      |
| PEU <sub>4a15</sub> A  | HOPCL <sub>4a15</sub> OH  | 23.6 ± 3.32           | 1503 ± 148          | 5.9 ± 5.3     | 22.0                      |
| PEU <sub>8a5</sub> A   | HOPCL <sub>8a5</sub> OH   | 31.4 ± 2.06           | 1399 ± 101          | 89.9 ± 8.2    | 7.0                       |
| PEU <sub>8a10</sub> A  | HOPCL <sub>8a10</sub> OH  | 32.4 ± 4.57           | 1527 ± 71           | 5.0 ± 1.3     | 12.5                      |
| PEU <sub>8a15</sub> A  | HOPCL <sub>8a15</sub> OH  | 26.1 ± 4.13           | 1641 ± 144          | 3.1 ± 0.6     | 20.0                      |
| PEU <sub>12a5</sub> A  | HOPCL <sub>12a5</sub> OH  | 22.4 ± 3.35           | 774 ± 99            | 87.9 ± 13.4   | 9.0                       |
| PEU <sub>12a10</sub> A | HOPCL <sub>12a10</sub> OH | 30.9 ± 6.62           | 1482 ± 168          | 5.1 ± 2.8     | 12.0                      |
| PEU <sub>12a15</sub> A | HOPCL <sub>12a15</sub> OH | 19.6 ± 2.37           | 1198 ± 235          | 108.0 ± 2.0   | 19.0                      |
| PEU <sub>4a5</sub> B   | HOPCL <sub>4a5</sub> OH   | 24.4 ± 3.85           | 1193 ± 96           | 4.1 ± 1.0     | -                         |
| PEU <sub>4a10</sub> B  | HOPCL <sub>4a10</sub> OH  | 19.3 ± 2.10           | 1747 ± 81           | 2.9 ± 0.5     | -                         |
| PEU <sub>4a15</sub> B  | HOPCL <sub>4a15</sub> OH  | 30.6 ± 4.85           | 1684 ± 144          | 63.8 ± 6.2    | 18.0                      |
| PEU <sub>8a5</sub> B   | HOPCL <sub>8a5</sub> OH   | 16.8 ± 2.51           | 1177 ± 39           | 4.4 ± 1.5     | -                         |
| PEU <sub>8a10</sub> B  | HOPCL <sub>8a10</sub> OH  | 19.3 ± 3.50           | 1705 ± 134          | 4.3 ± 0.8     | -                         |
| PEU <sub>8a15</sub> B  | HOPCL <sub>8a15</sub> OH  | 22.1 ± 2.41           | 1201 ± 71           | 13.1 ± 10.7   | 8.0                       |
| PEU <sub>12a5</sub> B  | HOPCL <sub>12a5</sub> OH  | 13.9 ± 2.29           | 1088 ± 55           | 3.9 ± 1.1     | -                         |
| PEU <sub>12a10</sub> B | HOPCL <sub>12a10</sub> OH | 19.3 ± 1.37           | 1670 ± 92           | 11.5 ± 18.5   | 1.0                       |
| PEU <sub>12a15</sub> B | HOPCL <sub>12a15</sub> OH | 29.2 ± 4.1            | 1552 ± 61           | 43.9 ± 22.7   | 16.0                      |
| PEU <sub>4a5</sub> C   | HOPCL <sub>4a5</sub> OH   | 22.7 ± 2.98           | 1678 ± 48           | 5.6 ± 1.8     | -                         |
| PEU <sub>4a10</sub> C  | HOPCL <sub>4a10</sub> OH  | 9.2 ± 1.17            | 1778 ± 155          | 1.4 ± 0.2     | -                         |
| PEU <sub>4a15</sub> C  | HOPCL <sub>4a15</sub> OH  | 14.4 ± 1.31           | 865 ± 32            | 95.6 ± 11.1   | 15.0                      |
| PEU <sub>8a5</sub> C   | HOPCL <sub>8a5</sub> OH   | 11.2 ± 3.60           | 2023 ± 95           | 2.8 ± 1.0     | 1.0                       |
| PEU <sub>8a10</sub> C  | HOPCL <sub>8a10</sub> OH  | 9.3 ± 1.48            | 2931 ± 229          | 1.3 ± 0.3     | -                         |
| PEU <sub>8a15</sub> C  | HOPCL <sub>8a15</sub> OH  | 39.6 ± 3.16           | 1710 ± 65           | 5.0 ± 0.6     | 4.0                       |
| PEU <sub>12a5</sub> C  | HOPCL <sub>12a5</sub> OH  | 21.0 ± 3.53           | 1424 ± 61           | 8.4 ± 2.5     | -                         |
| PEU <sub>12a10</sub> C | HOPCL <sub>12a10</sub> OH | 13.8 ± 4.40           | 1571 ± 78           | 3.1 ± 1.2     | 1.0                       |
| PEU <sub>12a15</sub> C | HOPCL <sub>12a15</sub> OH | 20.2 ± 2.23           | 1442 ± 211          | 42.5 ± 3.8    | 18.0                      |

HOPCLOH,  $\alpha,\omega$ -hydroxy telechelic poly( $\epsilon$ -caprolactone); PCL, poly( $\epsilon$ -caprolactone); PEU, poly(ester-urethane); A, 1,6-hexamethylene diisocyanate (HDI); B, methylene diphenyl diisocyanate (MDI); C, 4,4'-methylenebis (cyclohexyl isocyanate) (HMDI). DSC, differential scanning calorimetry.

<sup>a</sup>HOPCLOH= HO – PCL – OH or HO – (CH<sub>2</sub>)<sub>m</sub> – PCL – OH, where m = 4, 8, and 12.

<sup>b</sup>Obtained by DSC.

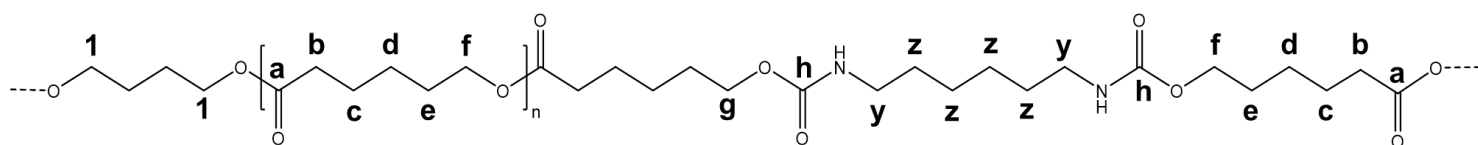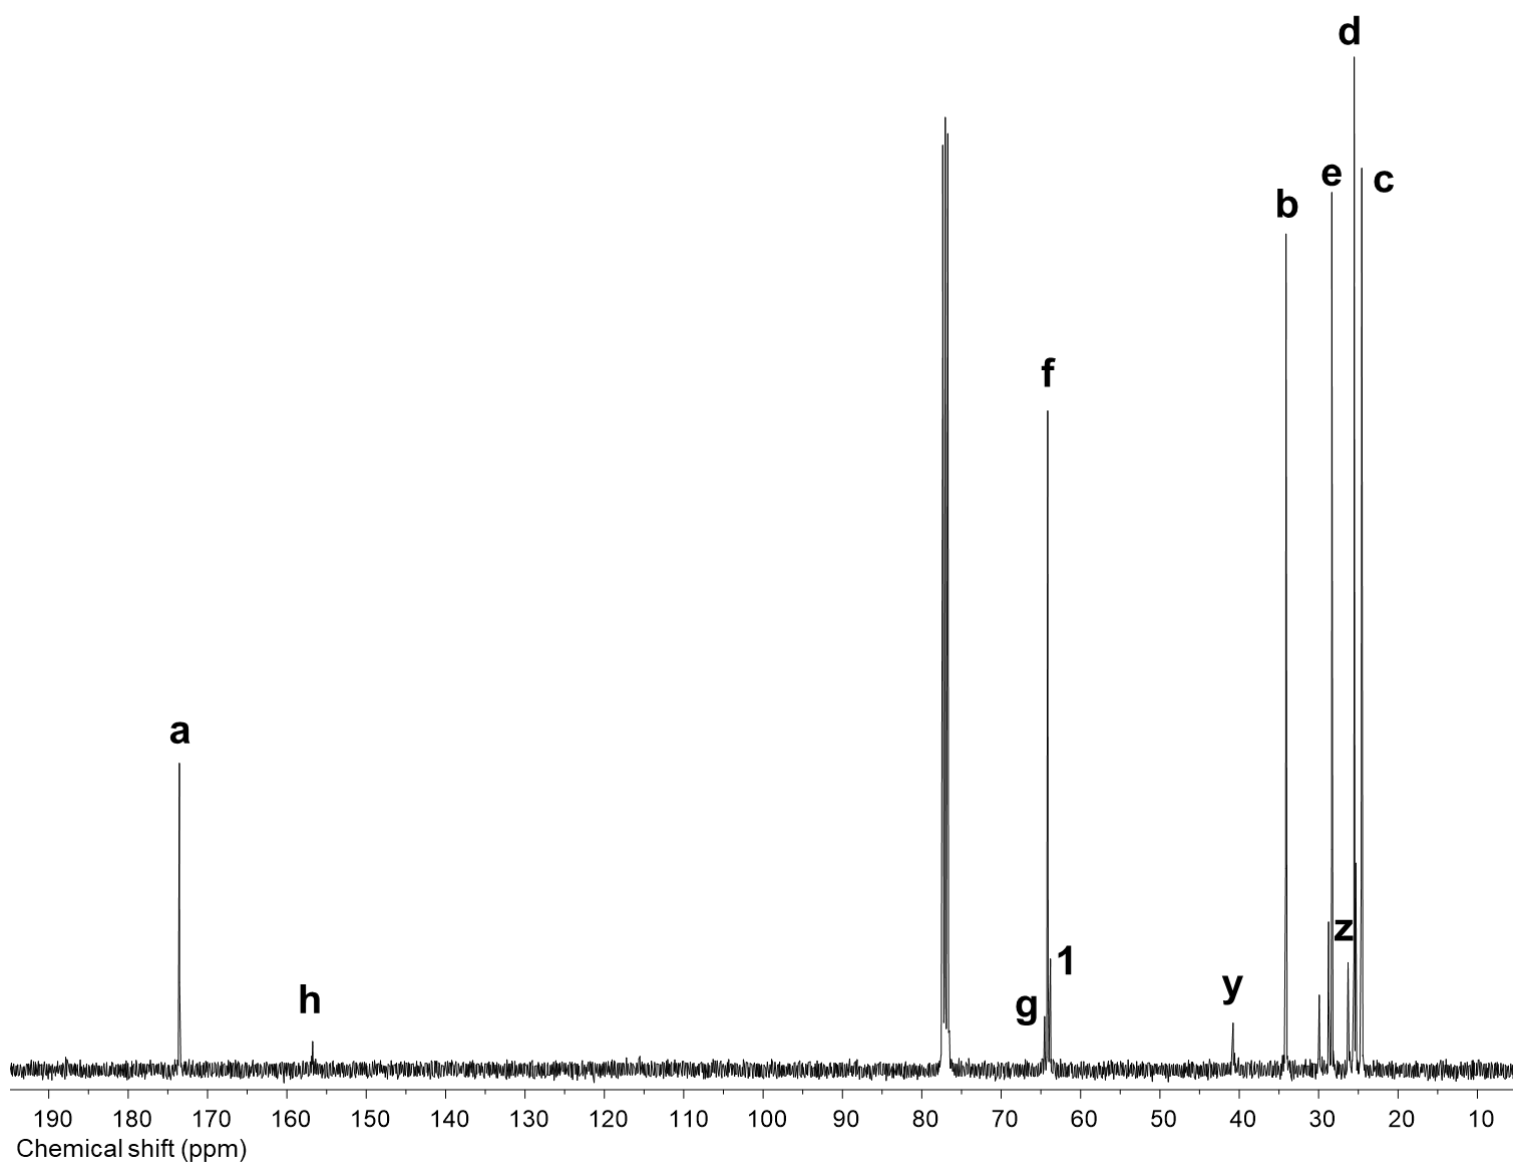

**Fig. S1.** <sup>13</sup>C NMR (100 MHz) spectrum in CDCl<sub>3</sub> at room temperature for PEU<sub>4a10A</sub>.

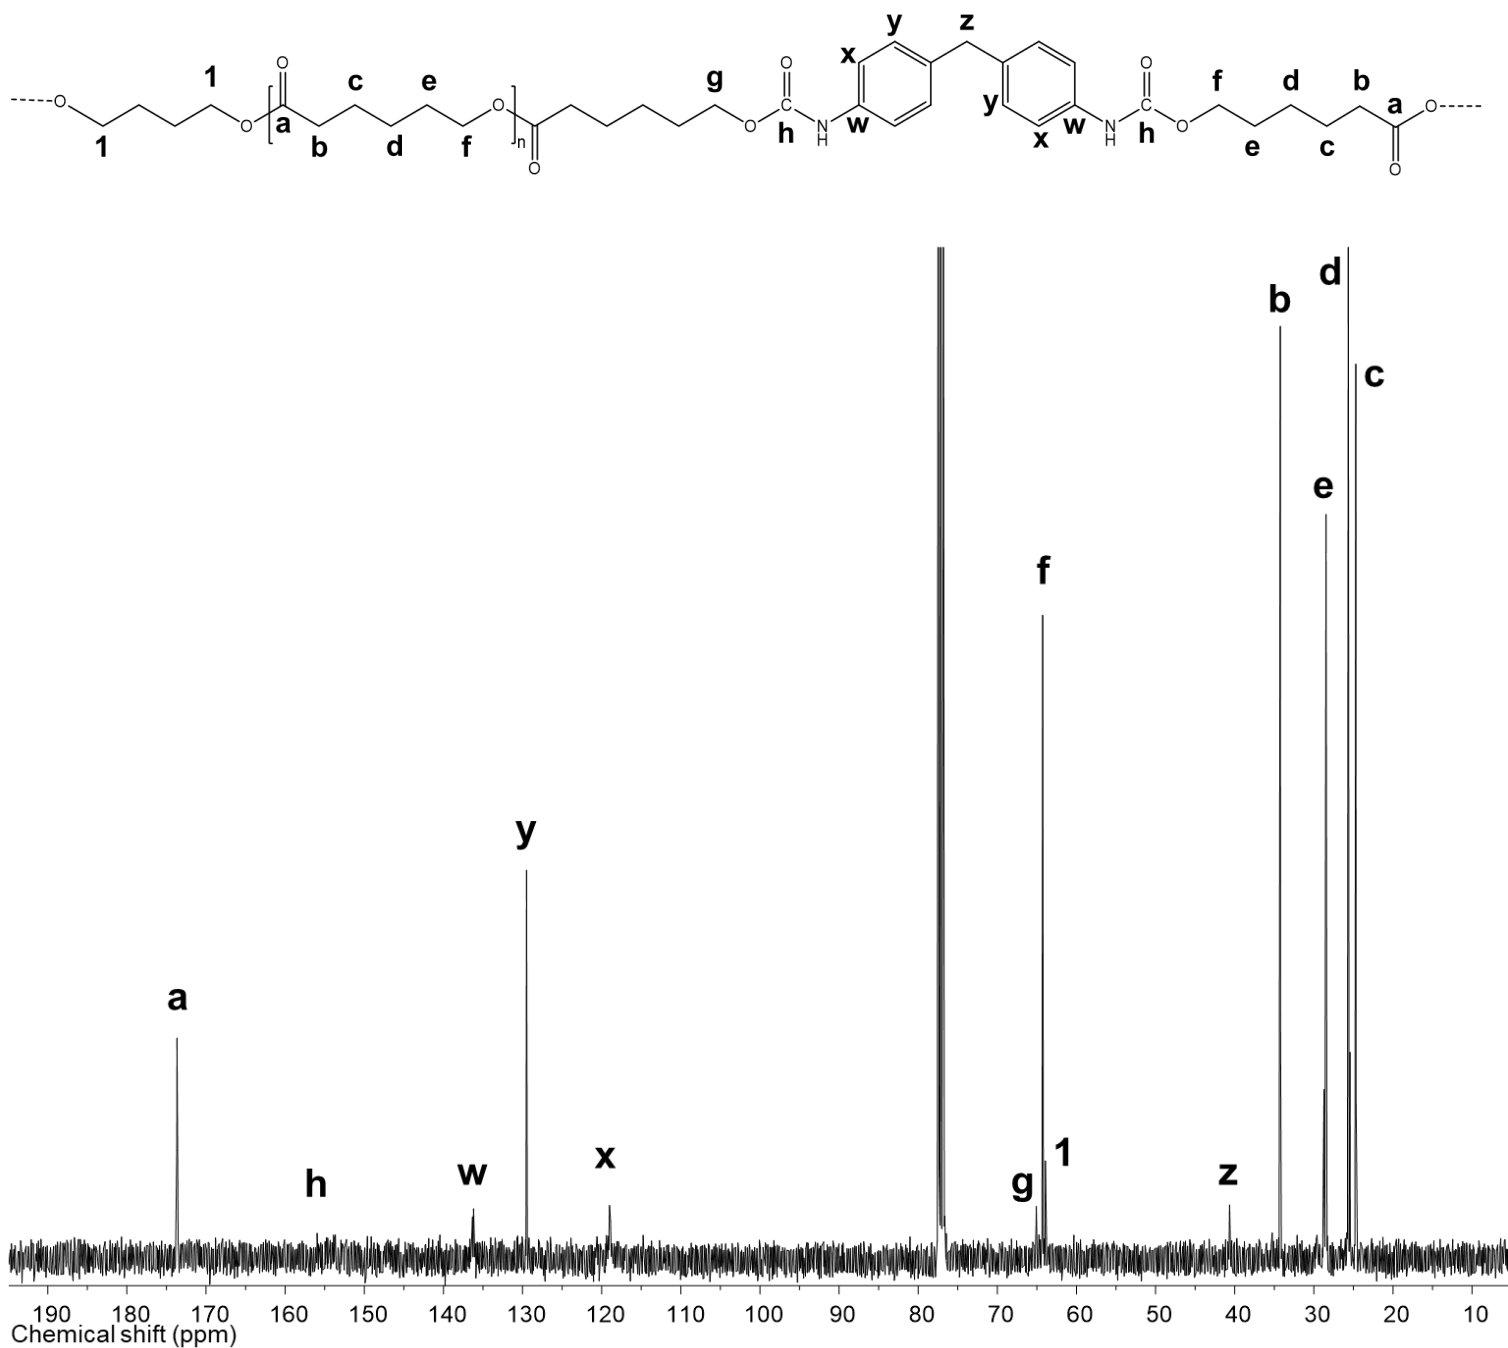

**Fig. S2.** <sup>13</sup>C NMR (100 MHz) spectrum in CDCl<sub>3</sub> at room temperature for PEU<sub>4a10B</sub>.

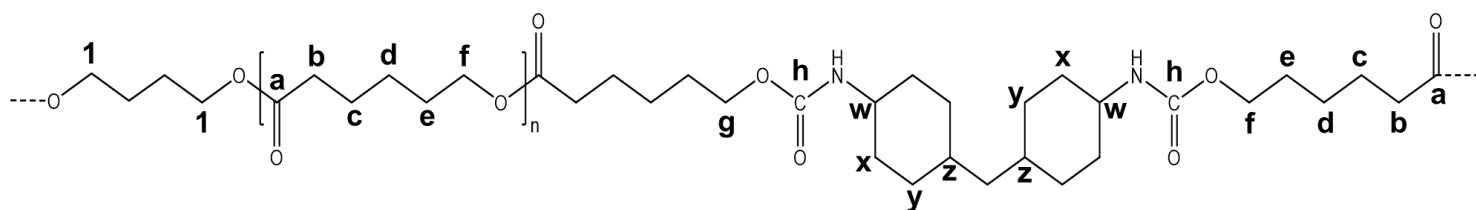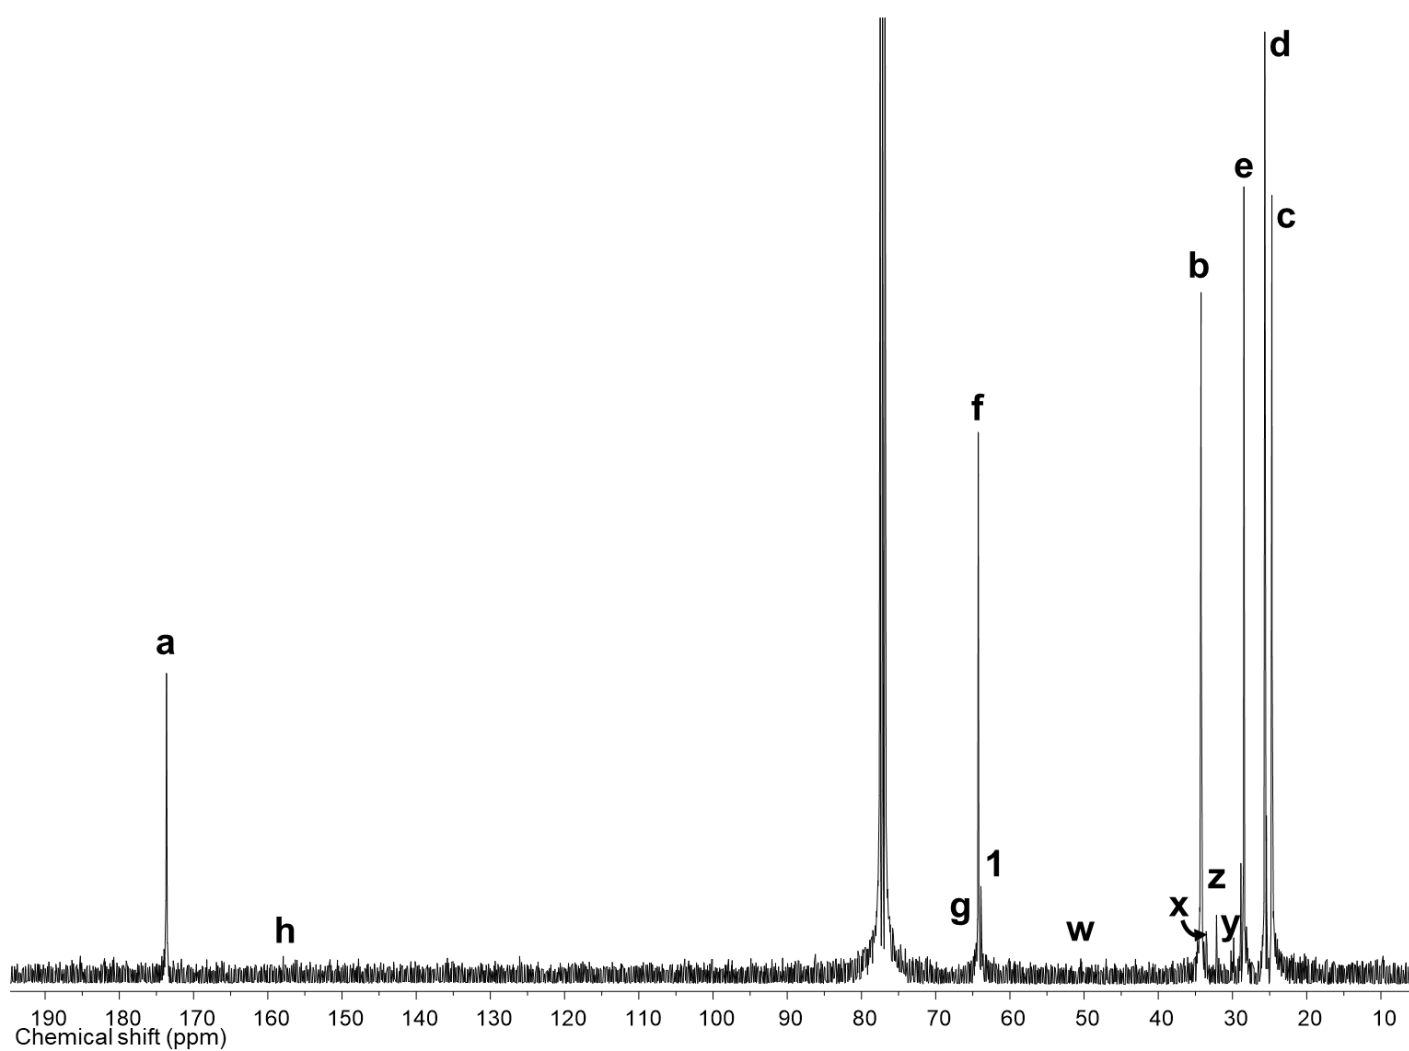

**Fig. S3.**  $^{13}\text{C}$  NMR (100 MHz) spectrum in  $\text{CDCl}_3$  at room temperature for  $\text{PEU}_{4a10C}$ .

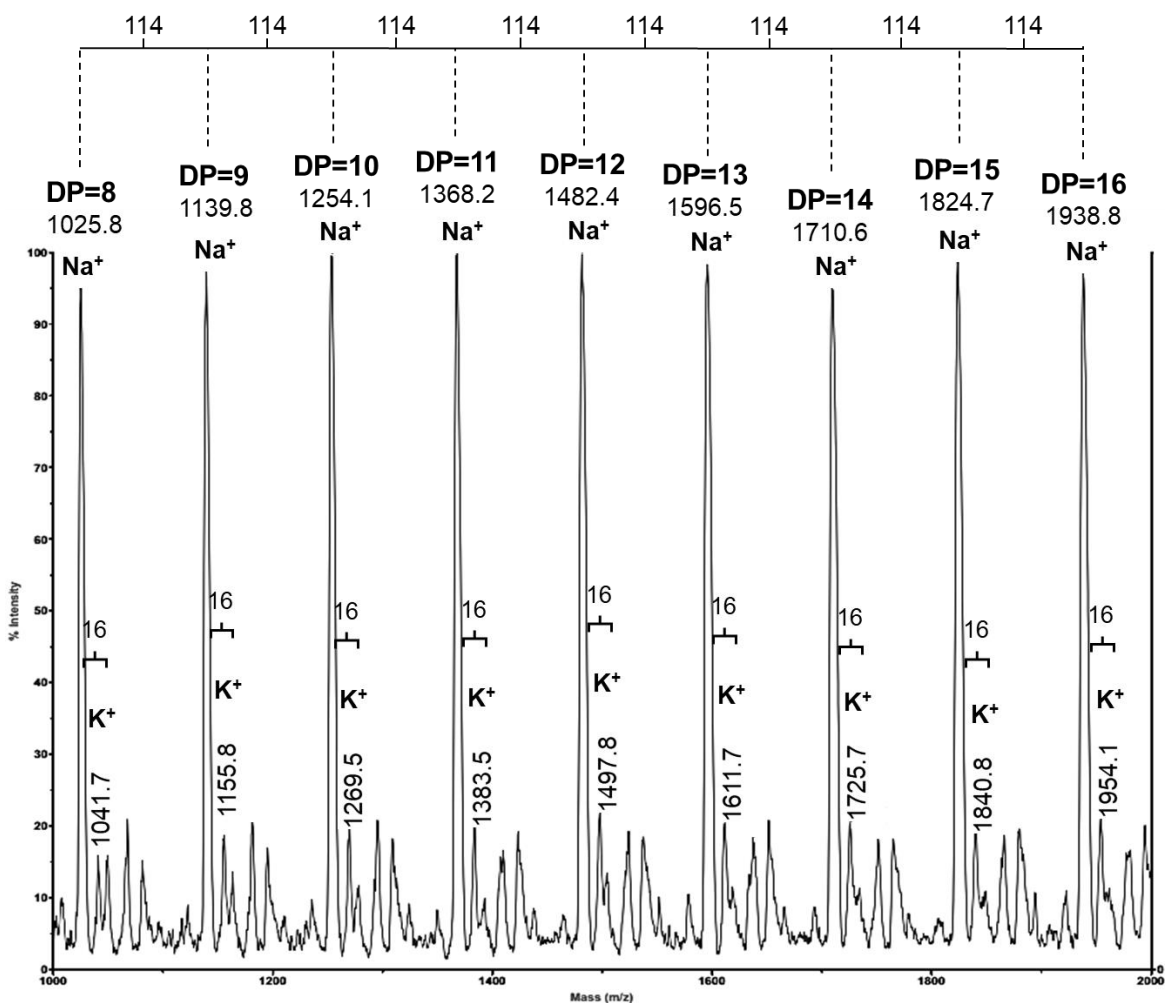

**Fig. S4.** MALDI-TOF spectrum (linear mode) expanded view for the 1000–2000 m/z fragments of HOPCL<sub>4a10</sub>OH (note: 114 and 16 are the values of the molecular weight of CL and the difference between Na<sup>+</sup> and K<sup>+</sup> (doping the same species of polymer), respectively).

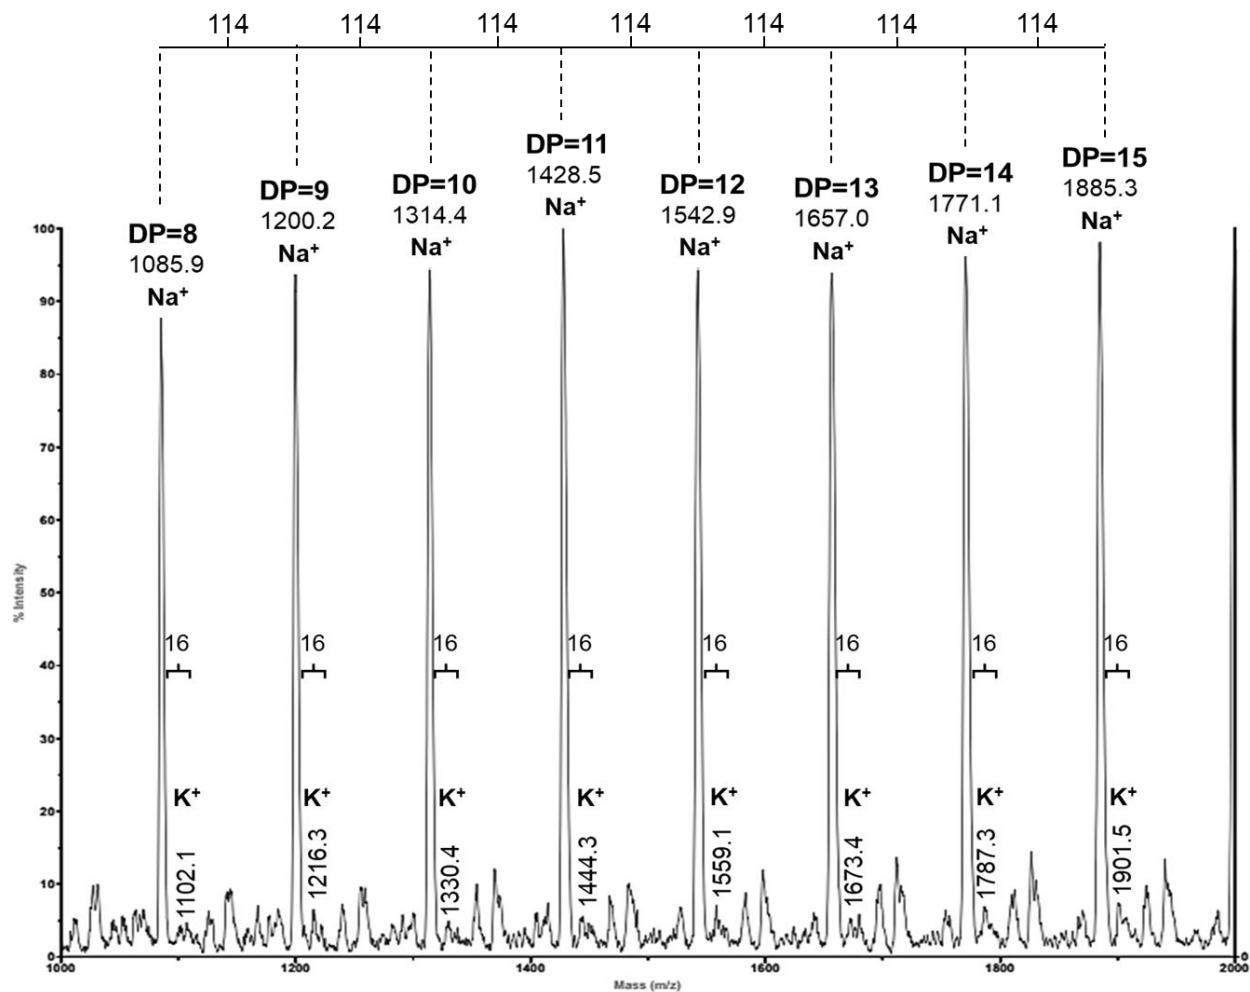

**Fig. S5.** MALDI-TOF spectrum (linear mode) expanded view for the 1000–2000 m/z fragments of HOPCL<sub>8a10</sub>OH (note: 114 and 16 are the values of the molecular weight of CL and the difference between Na<sup>+</sup> and K<sup>+</sup> (doping the same species of polymer), respectively).

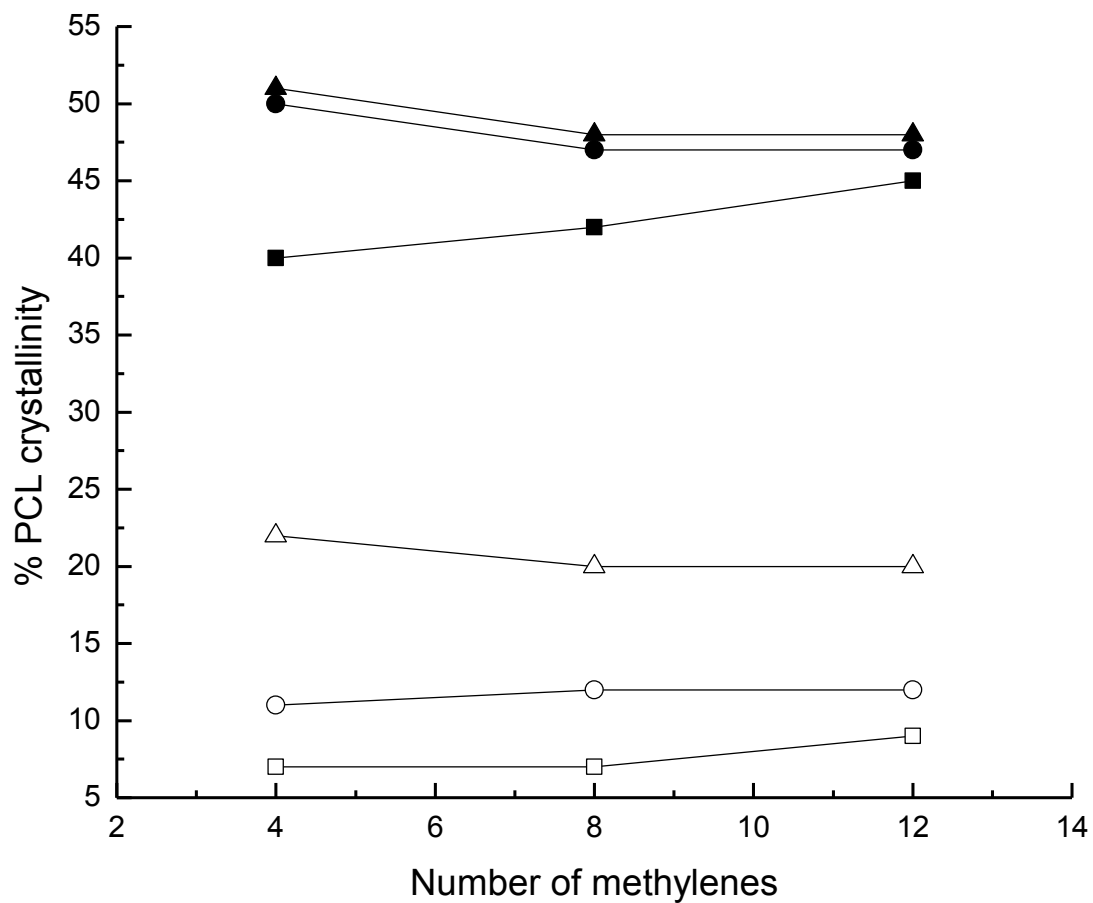

**Fig. S6.** Effect of number of methylenes on the crystallinity PCL for poly(ester-urethanes) (PEUs) derived from poly( $\epsilon$ -caprolactone) diols (HOPCLOH) and 1,6-hexamethylene diisocyanate (HDI). The PEUs derived from the macrodiols with DP=5 as initiator are indicated with open squares  $\square$ , and macrodiols are indicated with filled square  $\blacksquare$ ; PEUs derived from macrodiols with DP=10 as initiator are indicated with open circles  $\circ$ , and macrodiols are indicated with filled circles  $\bullet$ , and PEUs derived from macrodiols with DP=15 as initiator are indicated with open triangles  $\triangle$ , and macrodiols are indicated with filled triangle  $\blacktriangle$ .

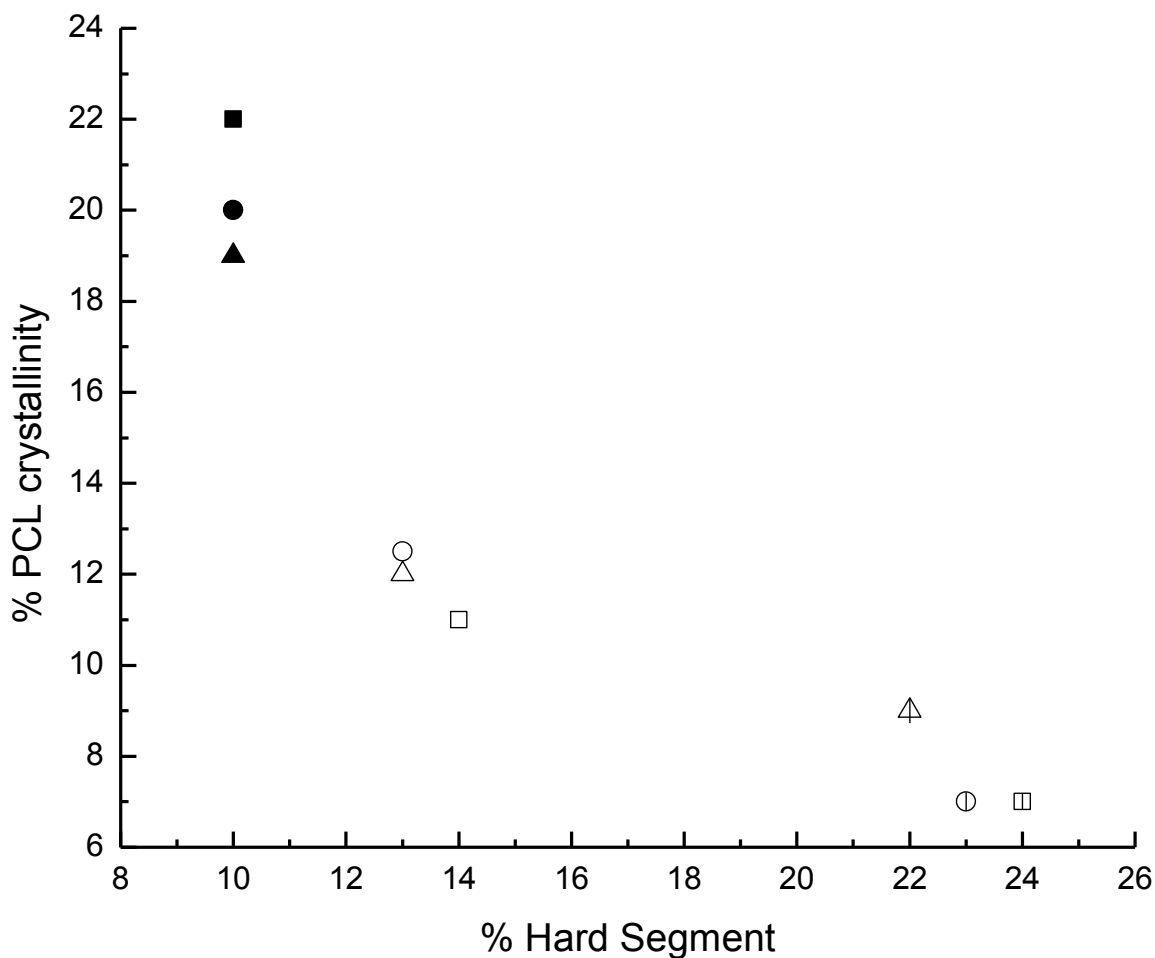

**Fig. S7.** Effect of Hard Segment (HS) content on the crystallinity PCL for poly(ester-urethanes) (PEUs) derived from poly( $\epsilon$ -caprolactone) diols (HOPCLOH) and 1,6-hexamethylene diisocyanate (HDI). The PEUs derived from the macrodiols with HO(CH<sub>2</sub>)<sub>4</sub>OH as initiator are indicated with squares ( $\square$  DP=5;  $\square$  DP=10, and  $\blacksquare$  DP=15); PEUs derived from macrodiols with HO(CH<sub>2</sub>)<sub>8</sub>OH as initiator are indicated with circles ( $\odot$  DP=5,  $\circ$  DP=10, and  $\bullet$  DP=15) and PEUs derived from macrodiols with HO(CH<sub>2</sub>)<sub>12</sub>OH as initiator are indicated with triangles ( $\triangle$  DP=5,  $\triangle$  DP=10, and  $\blacktriangle$  DP=15).



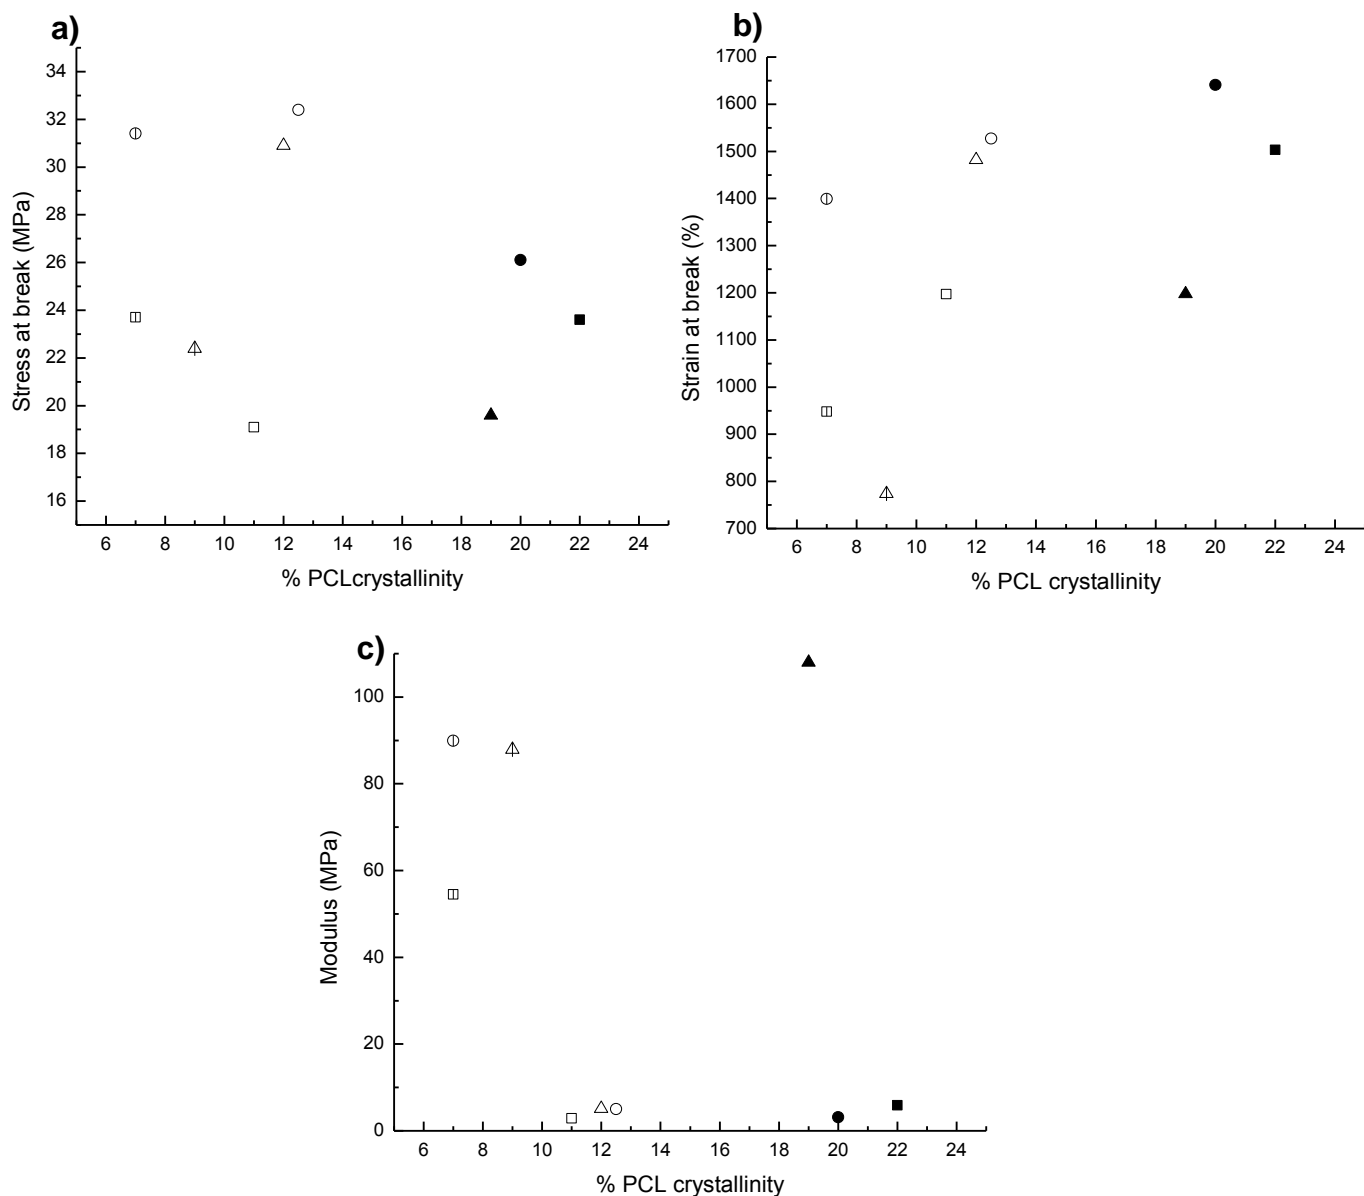

**Fig. S8.** Mechanical properties of the synthesized PEUs with HDI: a) stress at break, b) strain at break, and c) modulus. The PEUs derived from the macrodiols with HO(CH<sub>2</sub>)<sub>4</sub>OH as initiator are indicated with squares (◻ DP=5, ◻ DP=10, and ◼ DP=15); PEUs derived from macrodiols with HO(CH<sub>2</sub>)<sub>8</sub>OH used as initiator are indicated with circles (⊕ DP=5, ○ DP=10, and ● DP=15) and PEUs derived from macrodiols with HO(CH<sub>2</sub>)<sub>12</sub>OH as initiator are indicated with triangles (△ DP=5, △ DP=10, and ▲ DP=15).
